# Supplementary material for: Exploring supramolecular architectures in Mn(iii) two-compartment o-vanhd Schiff base complexes: insights from apical aqua ligands and bond valence sum analysis
Source: Royal Society of Chemistry journal article supplement (doi:10.1039/d4nj02177k), 2024-01-01
Supplement: d4nj02177k1.pdf [file d4nj02177k1.pdf]

## Exploring Supramolecular Architectures in Mn(III) Two-Compartment o-vanhd Schiff Base Complexes: Insights from Apical Aqua Ligands and Bond Valence Sum Analysis

Srinivasan Narayanaswamy,<sup>1,2\*</sup> Bhargavi G.,<sup>2</sup> Rajasekharan M. V. <sup>2</sup>

<sup>1</sup>Department of Chemistry, Saveetha School of Engineering, Saveetha Institute of Medical And Technical Sciences (SIMATS), Saveetha Nagar, Thandalam, Chennai-602105, Tamil Nadu, India.

<sup>2</sup>School of Chemistry, University of Hyderabad, Hyderabad, Telangana, India.

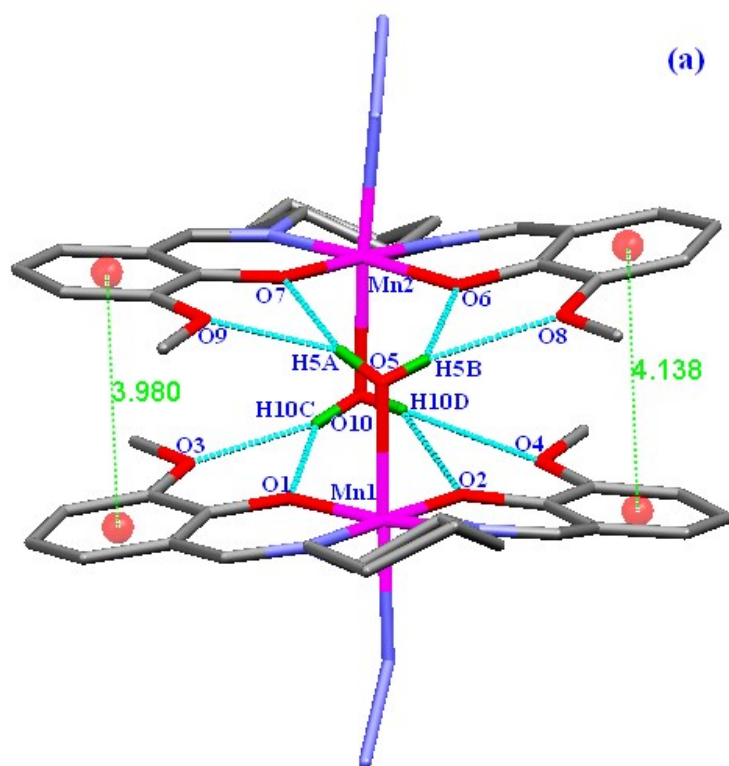

(b)

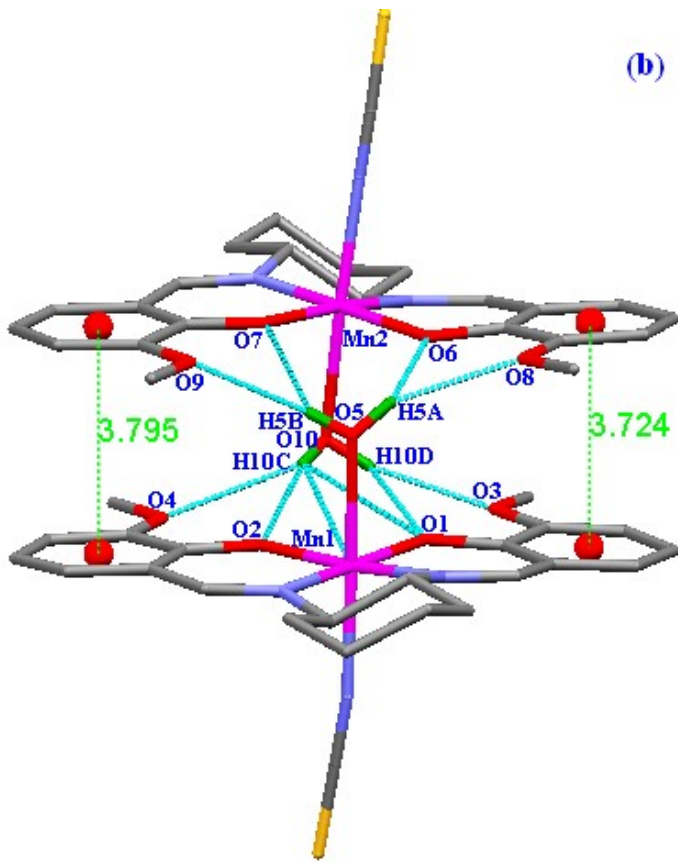

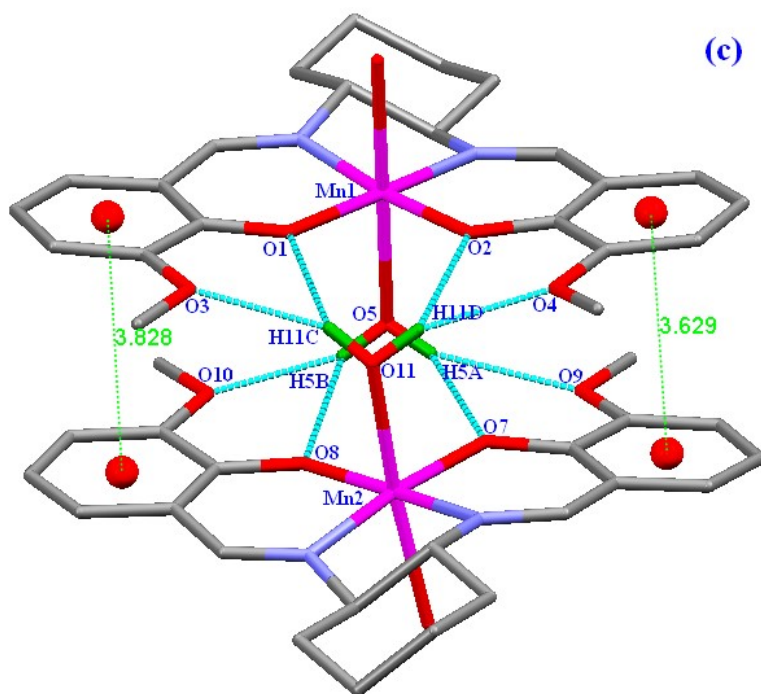

**Fig. S1** Formation of the supramolecular dimer of (a)  $[\text{Mn}(o\text{-vanhd})(\text{N}_3)(\text{H}_2\text{O})]\cdot\text{CH}_3\text{OH}$  (Solvated methanol molecules and hydrogen atoms are omitted for clarity), (b)  $[\text{Mn}(o\text{-vanhd})(\text{NCS})(\text{H}_2\text{O})]\cdot 2\text{CH}_3\text{CN}$  (Solvated acetonitrile molecules and hydrogen atoms are omitted for clarity), (c)  $[\text{Mn}(o\text{-vanhd})(\text{H}_2\text{O})_2]\text{ClO}_4\cdot\text{H}_2\text{O}$ .

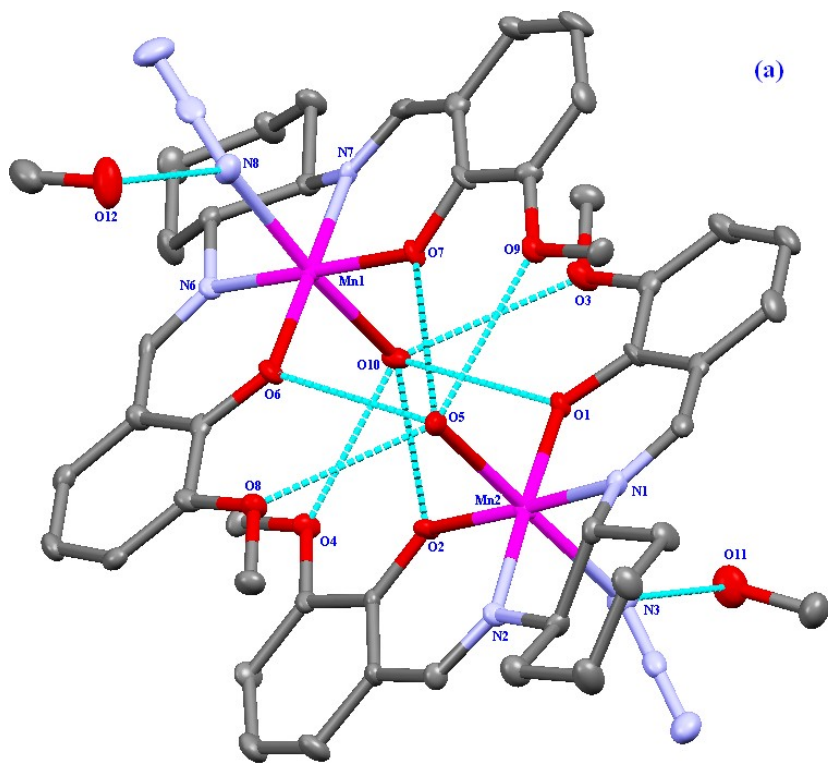



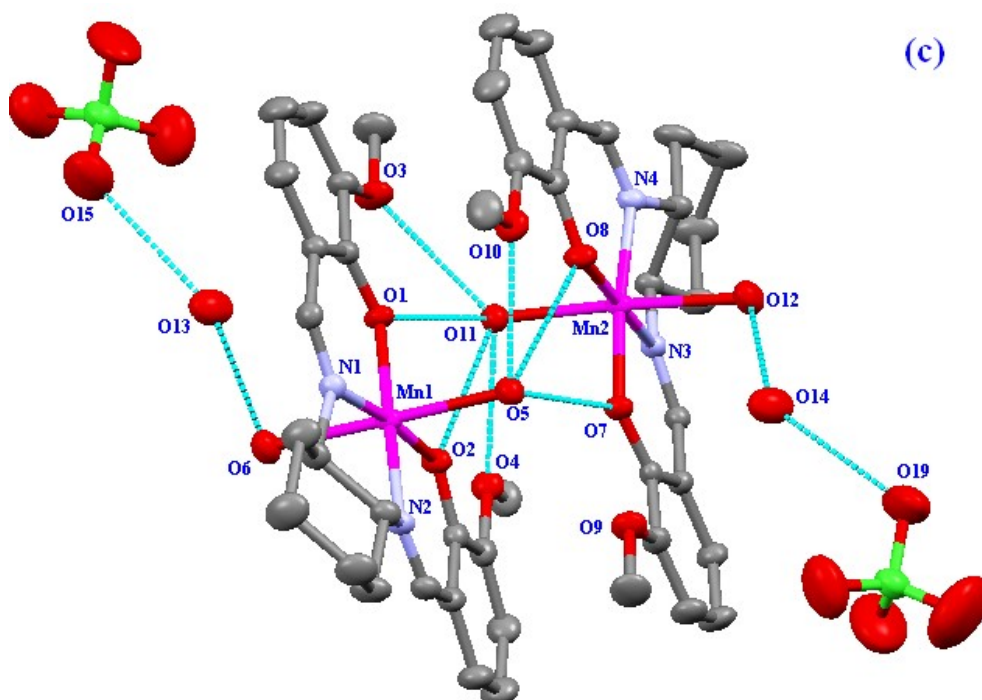

**Fig. S2**  $\pi$ - $\pi$  Stacking interactions within the supramolecular dimer of [Mn(*o*-vanhd)(N<sub>3</sub>)(H<sub>2</sub>O)]·CH<sub>3</sub>OH (Solvated methanol molecules and hydrogen atoms are omitted for clarity), (b) [Mn(*o*-vanhd)(NCS)(H<sub>2</sub>O)]. 2CH<sub>3</sub>CN (Solvated acetonitrile molecules and hydrogen atoms are omitted for clarity), (c) [Mn(*o*-vanhd)(H<sub>2</sub>O)<sub>2</sub>] ClO<sub>4</sub>·H<sub>2</sub>O.

**<sup>1</sup>H NMR**

**Mn N3**

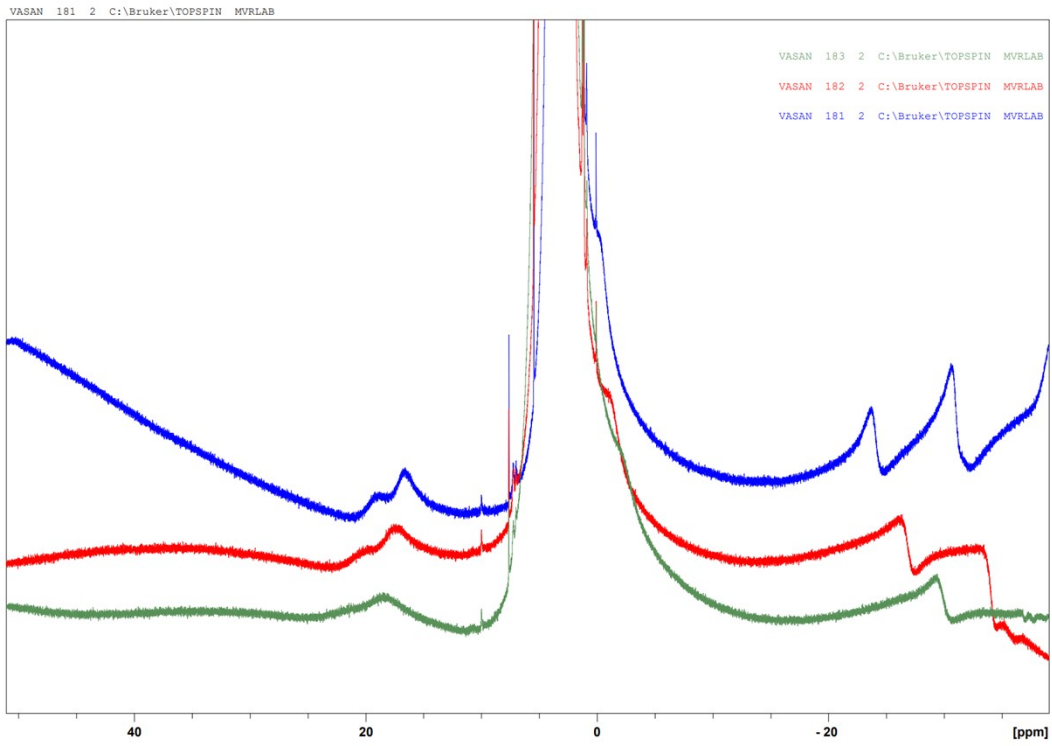

### Mn ClO4

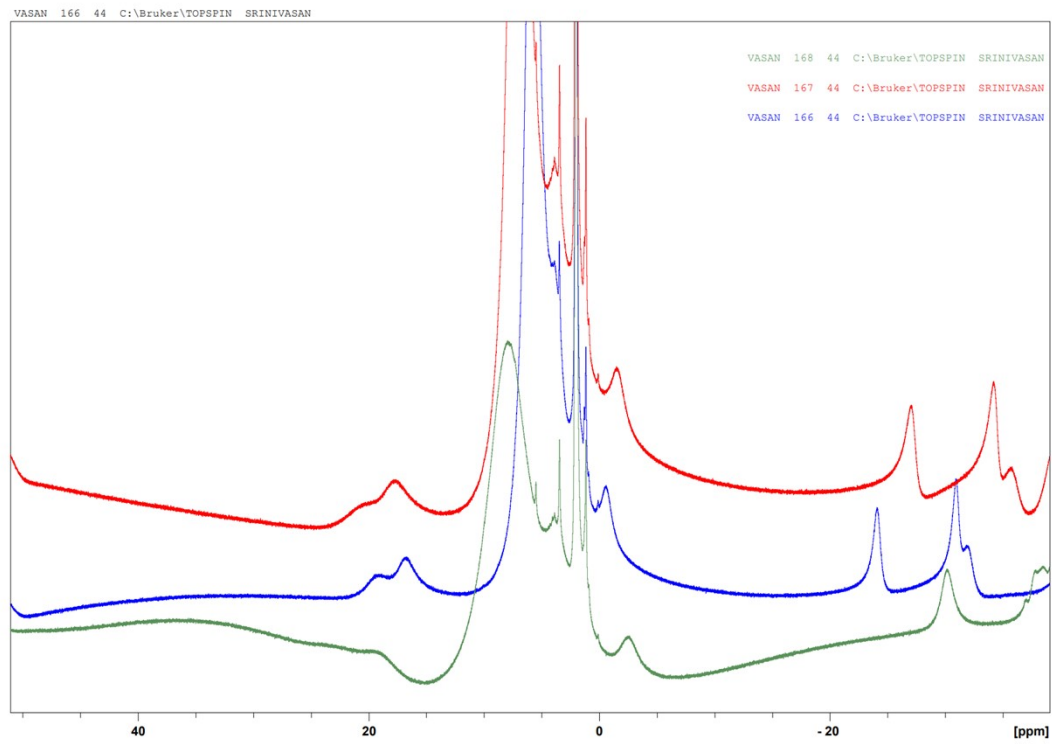

**Fig. S3** <sup>1</sup>H NMR spectra of [Mn(*o*-vanhd)(N<sub>3</sub>)(H<sub>2</sub>O)]·CH<sub>3</sub>OH(**1**) and [Mn(*o*-vanhd)(H<sub>2</sub>O)]·ClO<sub>4</sub>·H<sub>2</sub>O (**3**) complexes.

### BOND VALENCE SUM ANALYSIS (BVS)

Manganese is an interesting metal not only in application part and its structural aspects. It exhibits different oxygen states in the complexes. For that, we decided to use bond valence sum analysis to predict formal oxidation number as well as to check the quality of crystal data and interactions of molecules. Many programs are involved in calculating the formal oxidation number and quality of a crystal by using certain parameters like bond lengths of the metal center.

**Table S1** Selected Bond Distances (Å) in MnO<sub>4</sub>N<sub>2</sub> units and Bond valence sum

| Complex                                                                                       | Bond   | d(Å)  | Expo2014<br>BV (v.u.) | Calculated<br>BVS (S <sub>ij</sub> ) | Bond         | d(Å)  | Expo2014<br>BV (v.u.) | Calculated<br>BVS (S <sub>ij</sub> ) |
|-----------------------------------------------------------------------------------------------|--------|-------|-----------------------|--------------------------------------|--------------|-------|-----------------------|--------------------------------------|
| [Mn( <i>o</i> -vanhd)(N <sub>3</sub> )-<br>(H <sub>2</sub> O)]·CH <sub>3</sub> OH( <b>1</b> ) | Mn1-O1 | 1.889 | 0.693                 | 0.654                                | Mn2-O6       | 1.884 | 0.701                 | 0.663                                |
|                                                                                               | Mn1-O2 | 1.886 | 0.698                 | 0.660                                | Mn2-O7       | 1.866 | 0.736                 | 0.696                                |
|                                                                                               | Mn1-O5 | 2.265 | 0.251                 | 0.237                                | Mn2-O10      | 2.258 | 0.256                 | 0.241                                |
|                                                                                               | Mn1-N1 | 1.992 | 0.632                 | 0.658                                | Mn2-N6       | 1.988 | 0.638                 | 0.665                                |
|                                                                                               | Mn1-N2 | 1.982 | 0.648                 | 0.676                                | Mn2-N7       | 1.990 | 0.635                 | 0.661                                |
|                                                                                               | Mn1-N3 | 2.238 | 0.325                 | 0.338                                | Mn2-N8       | 2.242 | 0.321                 | 0.335                                |
|                                                                                               |        |       |                       | <b>3.247</b>                         | <b>3.223</b> |       |                       | <b>3.287</b>                         |
| [Mn( <i>o</i> -vanhd)(NCS)-<br>(H <sub>2</sub> O)]·2CH <sub>3</sub> CN ( <b>2</b> )           | Mn1-O1 | 1.904 | 0.666                 | 0.628                                | Mn2-O6       | 1.875 | 0.719                 | 0.679                                |
|                                                                                               | Mn1-O2 | 1.891 | 0.688                 | 0.651                                | Mn2-O7       | 1.879 | 0.711                 | 0.670                                |
|                                                                                               | Mn1-O5 | 2.292 | 0.233                 | 0.220                                | Mn2-O10      | 2.309 | 0.223                 | 0.210                                |
|                                                                                               | Mn1-N1 | 1.992 | 0.632                 | 0.658                                | Mn2-N4       | 1.992 | 0.631                 | 0.661                                |
|                                                                                               | Mn1-N2 | 1.987 | 0.640                 | 0.646                                | Mn2-N5       | 1.972 | 0.667                 | 0.698                                |
|                                                                                               | Mn1-N3 | 2.221 | 0.340                 | 0.354                                | Mn2-N6       | 2.207 | 0.354                 | 0.365                                |
|                                                                                               |        |       |                       | <b>3.199</b>                         | <b>3.157</b> |       |                       | <b>3.305</b>                         |
| [Mn( <i>o</i> -vanhd)(H <sub>2</sub> O)]·<br>ClO <sub>4</sub> ·H <sub>2</sub> O ( <b>3</b> )  | Mn1-O1 | 1.874 | 0.721                 | 0.681                                | Mn2-O7       | 1.884 | 0.701                 | 0.663                                |
|                                                                                               | Mn1-O2 | 1.875 | 0.720                 | 0.679                                | Mn2-O8       | 1.878 | 0.714                 | 0.674                                |
|                                                                                               | Mn1-O5 | 2.272 | 0.246                 | 0.232                                | Mn2-O11      | 2.269 | 0.248                 | 0.234                                |
|                                                                                               | Mn1-O6 | 2.318 | 0.217                 | 0.205                                | Mn2-O12      | 2.273 | 0.245                 | 0.232                                |
|                                                                                               | Mn1-N1 | 1.980 | 0.653                 | 0.679                                | Mn2-N3       | 1.983 | 0.648                 | 0.674                                |
|                                                                                               | Mn1-N2 | 1.979 | 0.654                 | 0.681                                | Mn2-N4       | 1.982 | 0.649                 | 0.676                                |
|                                                                                               |        |       |                       | <b>3.211</b>                         | <b>3.157</b> |       |                       | <b>3.205</b>                         |
